# Supplementary material for: Simultaneous detection of dopamine and ascorbic acid by using a thread-based microfluidic device and multiple pulse amperometry
Source: Royal Society of Chemistry journal article supplement (doi:10.1039/d3ay00693j), 2023-01-01
Supplement: d3ay00693j1.pdf [file d3ay00693j1.pdf]

## **Simultaneous detection of dopamine and ascorbic acid by a thread-based microfluidic device and multiple pulse amperometry**

*Vanessa W. dos Santos<sup>1</sup>, Gustavo Martins<sup>1</sup>, Jeferson L. Gogola<sup>1</sup>, Cristiane Kalinke<sup>2</sup>, Deonir Agustini<sup>1</sup>, Márcio F. Bergamini<sup>1</sup> and Luiz H. Marcolino-Junior<sup>1\*</sup>*

<sup>1</sup> *Laboratory of Electrochemical Sensors (LabSense) Chemistry Department, Federal University of Paraná (UFPR), CEP 81.531-980, Curitiba-PR, Brazil.*

<sup>2</sup> *Institute of Chemistry, University of Campinas (UNICAMP), CEP 13083-859, Campinas-SP, Brazil.*

\*Corresponding author: [luiz1berto@ufpr.br](mailto:luiz1berto@ufpr.br) (L. H. Marcolino-Junior)

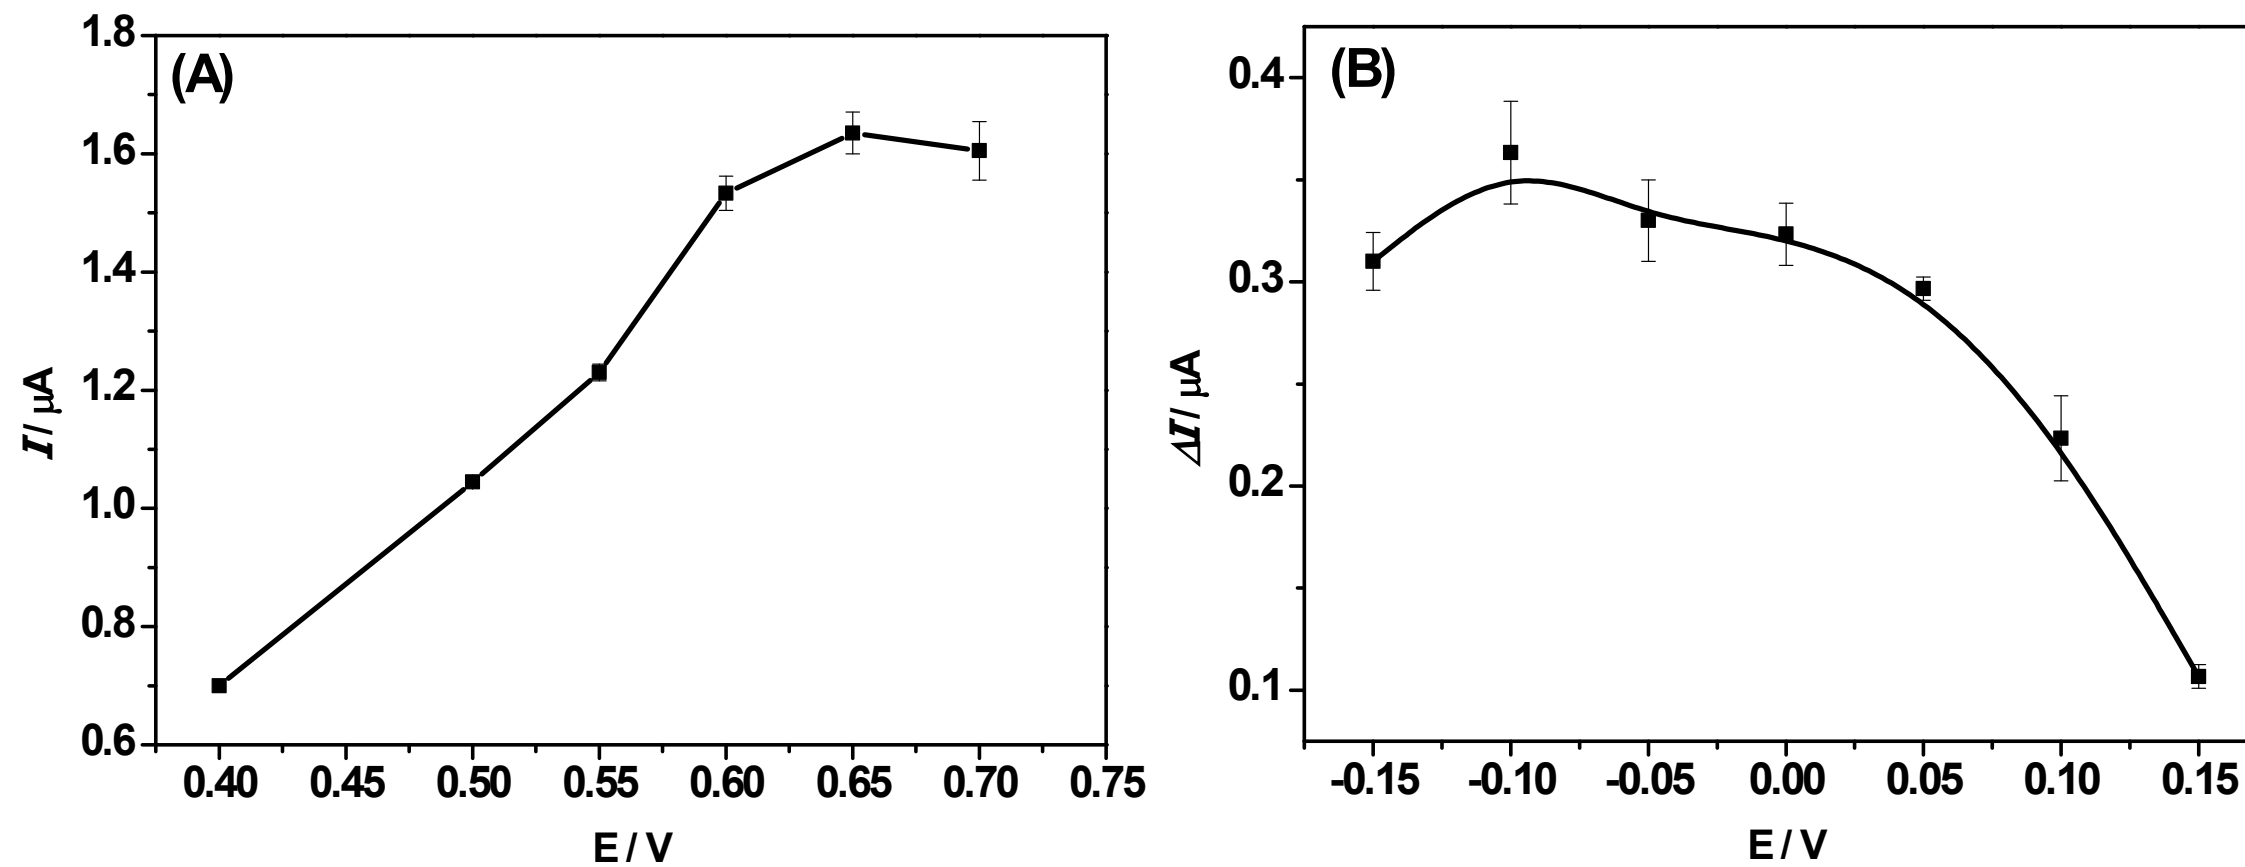

**Fig. S1.** – Study of potential applied for oxidation and reduction of 0.10 mmol L<sup>-1</sup> DA and AA and the resulted summarized (A) Anodic peaks and (B) Cathodic peaks.

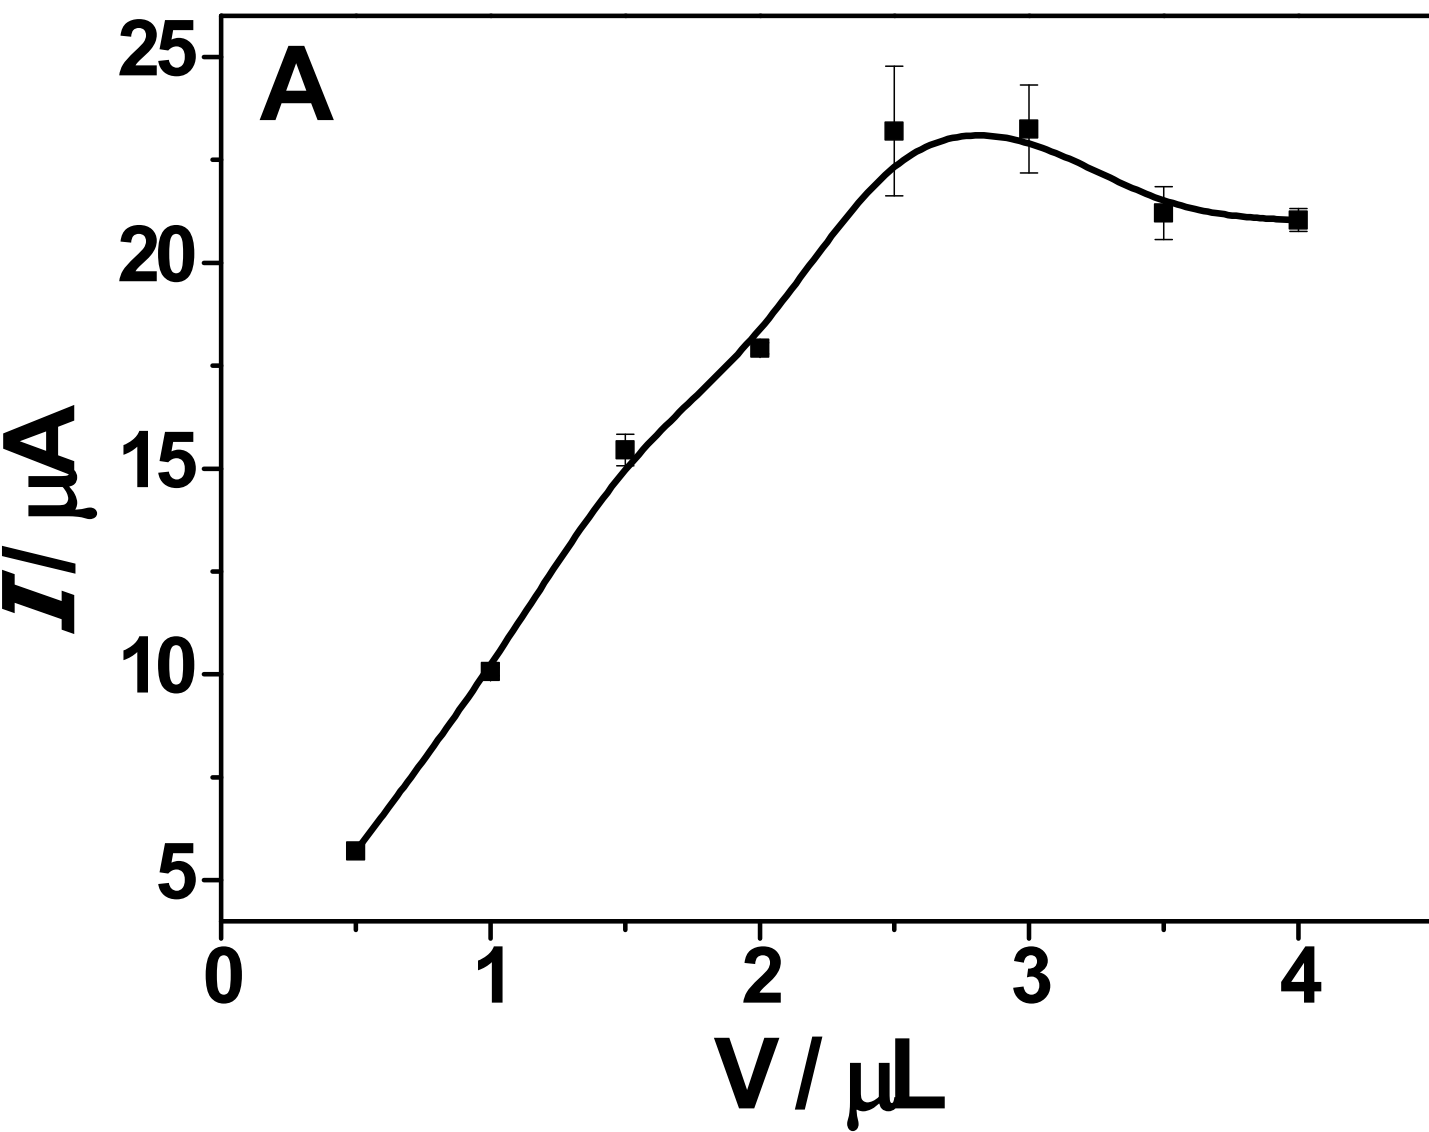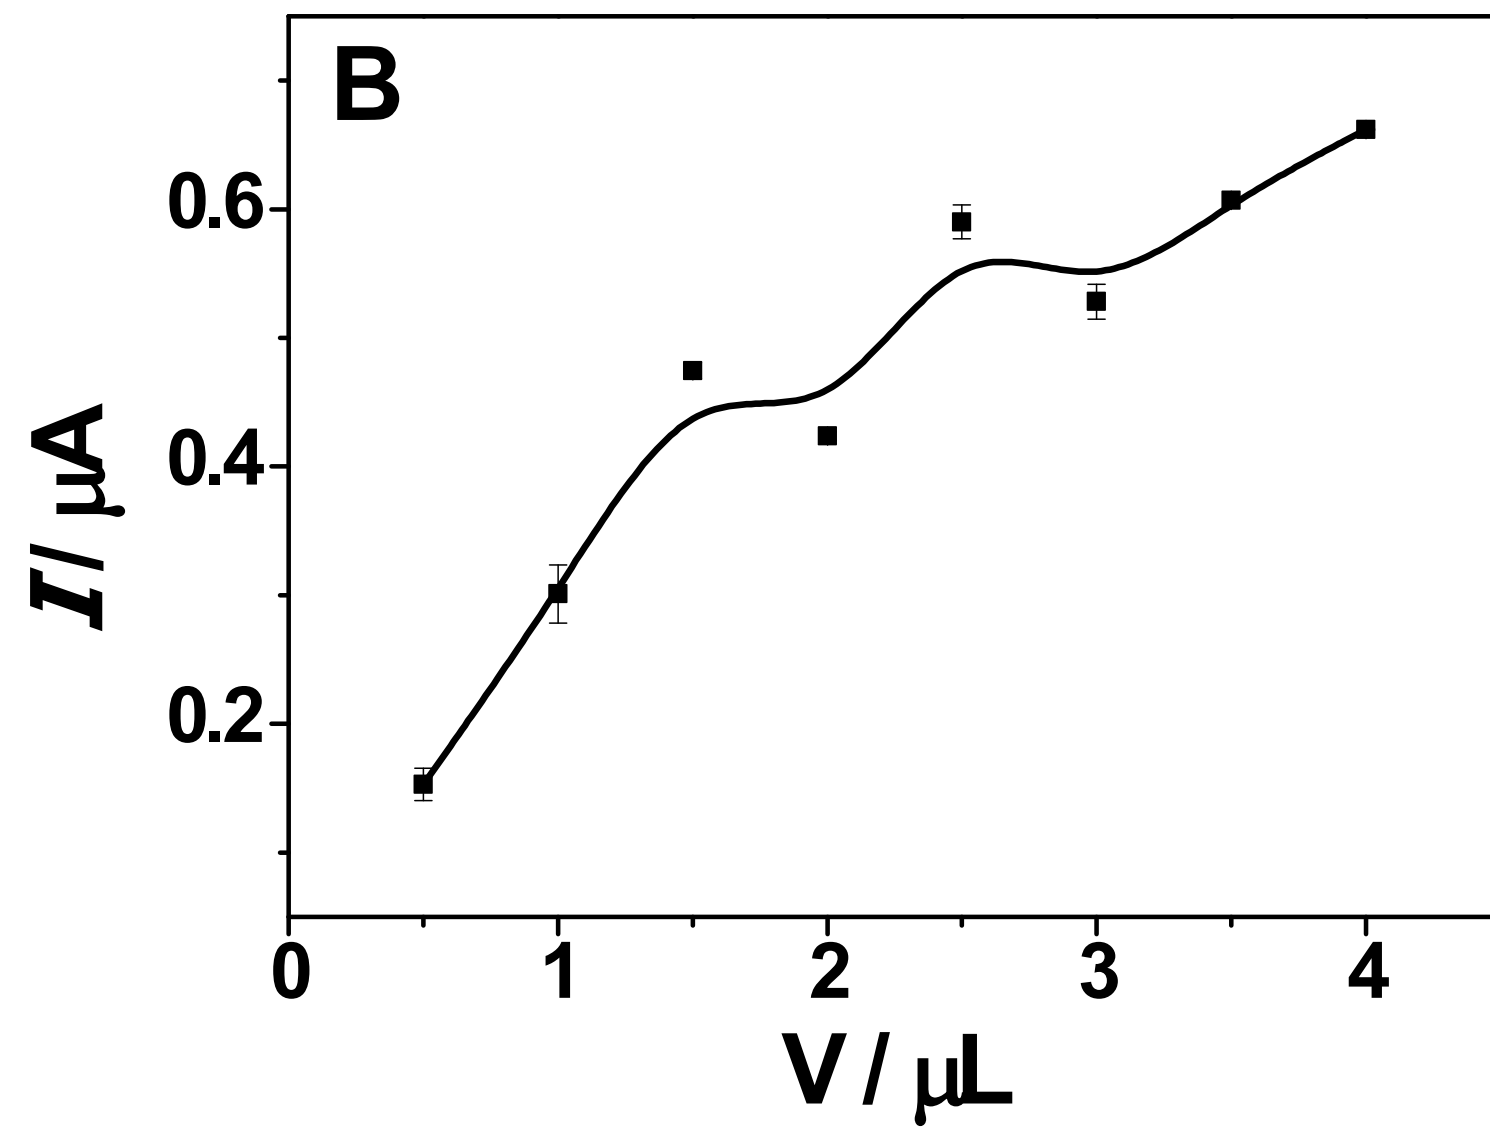

**Fig. S2.** – Injection volume study using  $0.10 \text{ mmol L}^{-1}$  of DA and AA and the resulted (A) Cathodic peaks and (B) Anodic peaks.

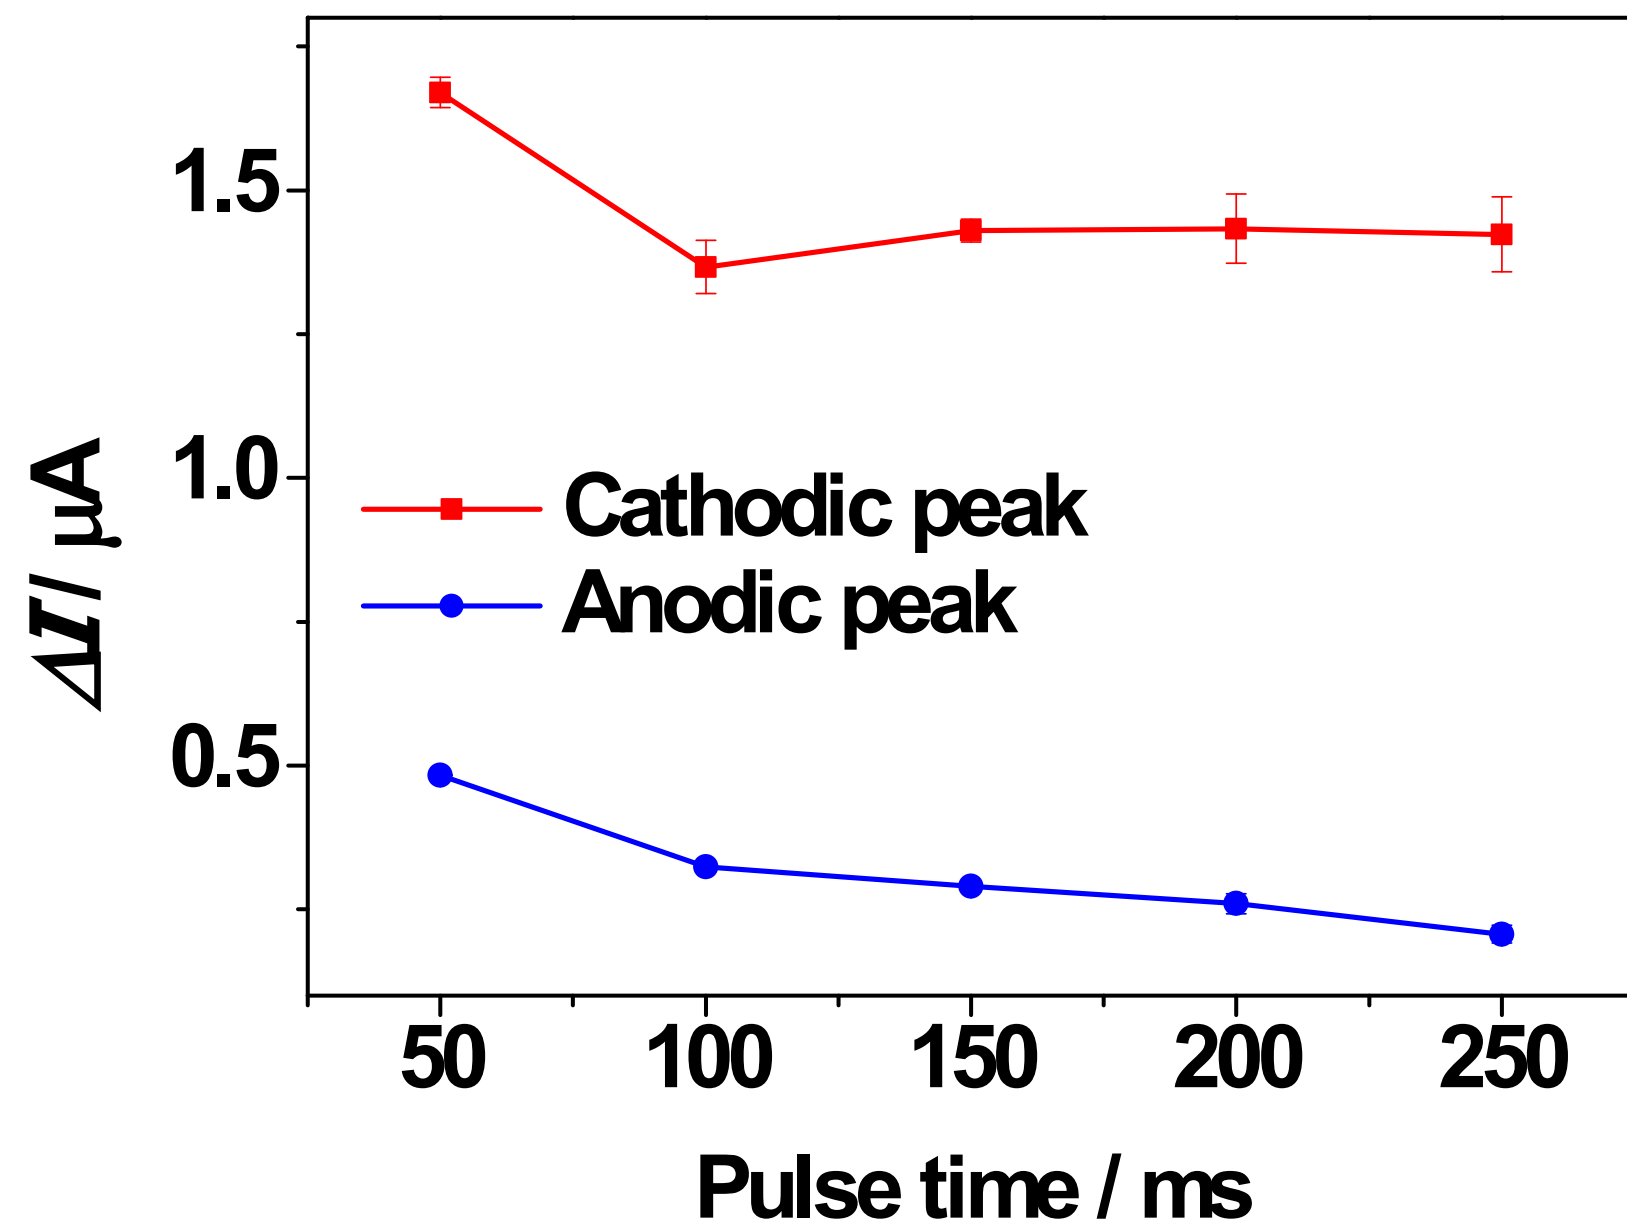

**Fig. S3.** – MPA pulse time study.

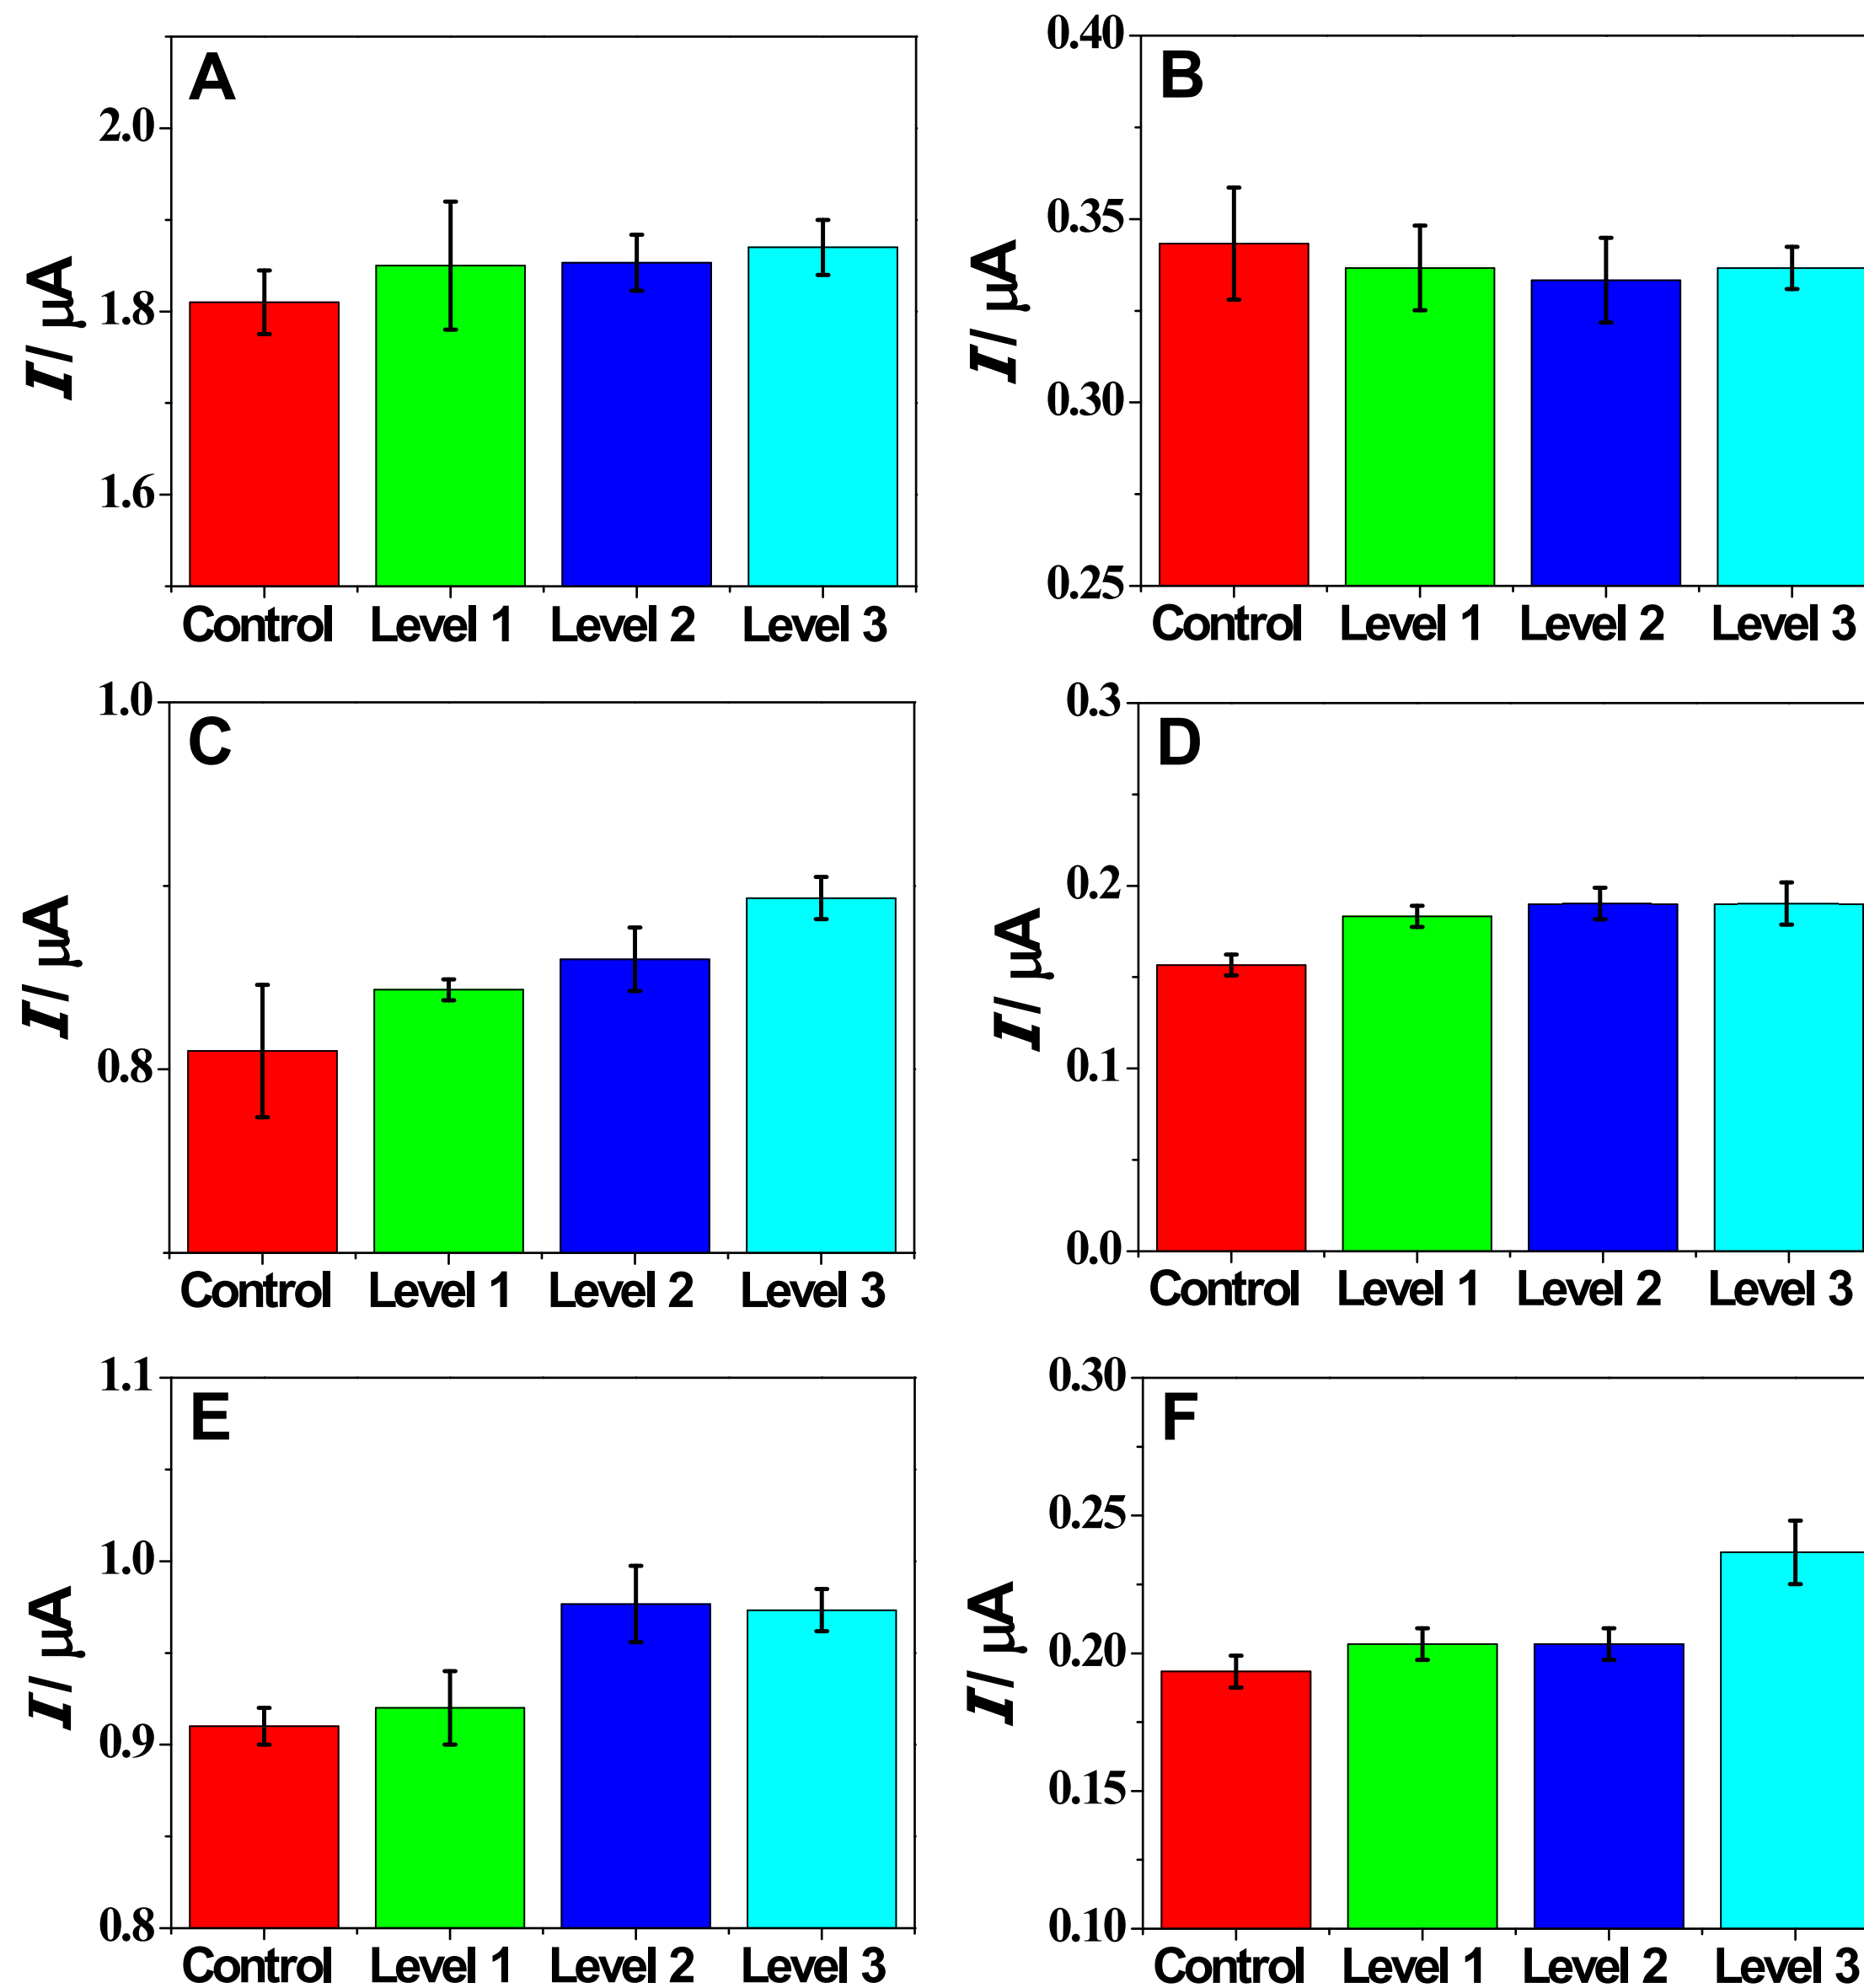

**Fig. S4.** – Interference of the MPA signal by: (A)(B) Uric Acid, cathodic and anodic peak respectively; (C)(D) NaCl cathodic and anodic peak respectively; (E)(F) Glucose cathodic and anodic peak respectively;

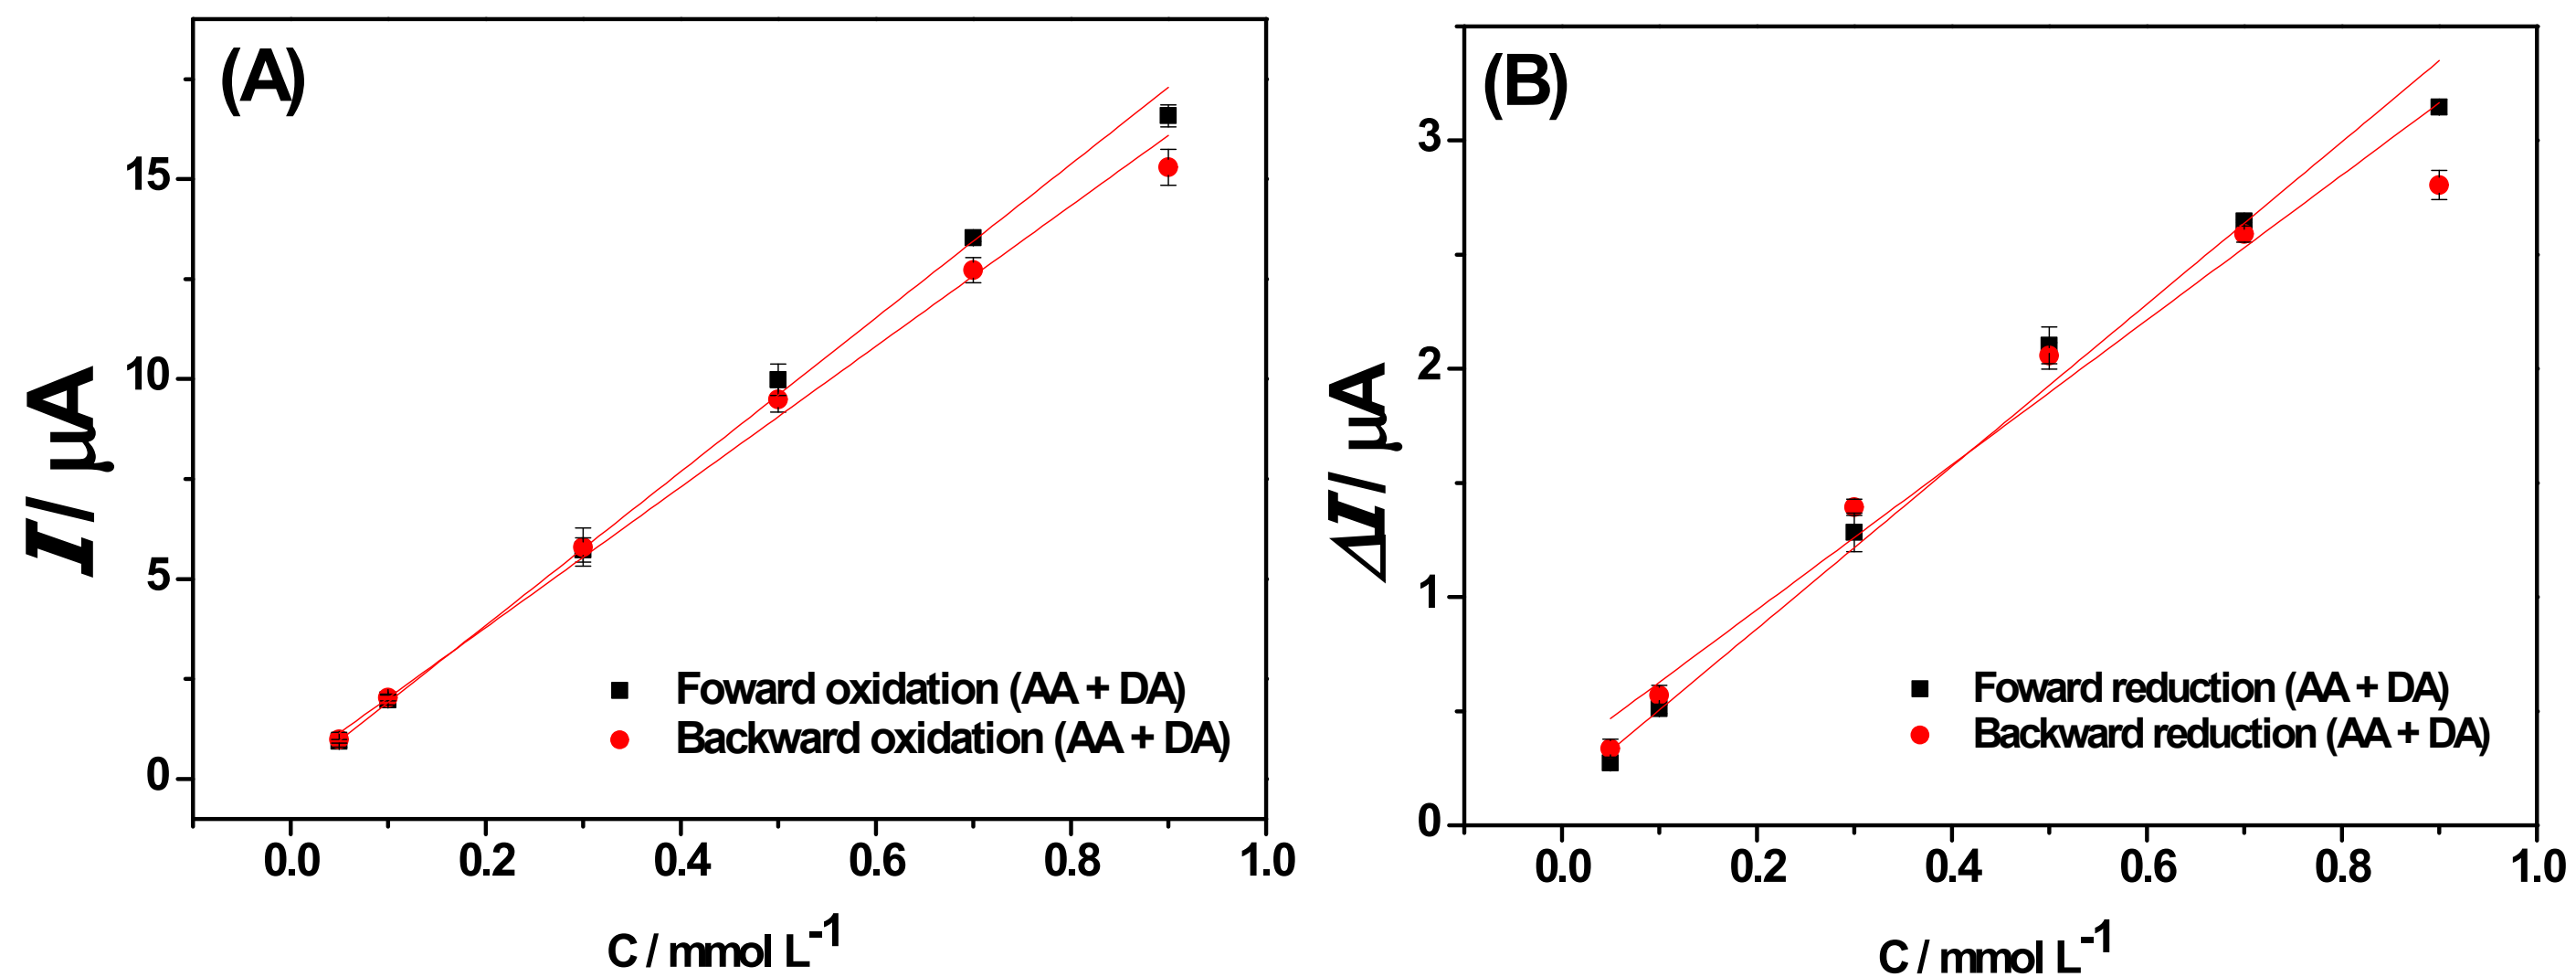

**Fig. S5** – **(A)** Calibration plots for AA + DA forward and backward additions, data from anodic peaks (oxidation). **(B)** Calibration plots for AA + DA forward and backward additions, data from cathodic peaks (reduction).
